# Supplementary material for: Visual evaluation of acetylcholinesterase inhibition by an easy-to-operate assay based on N-doped carbon nanozyme with high stability and oxidase-like activity
Source: Royal Society of Chemistry journal article supplement (doi:10.1039/d3tb00238a), 2023-01-01
Supplement: d3tb00238a1.pdf [file d3tb00238a1.pdf]

**Visualized Evaluation of Acetylcholinesterase Inhibition by an Easy-to-Operate Assay Based on *N*-doped Carbon Nanozyme with High Stability and Oxidase-Like Activity**

Mengli Zhang<sup>a, b</sup>, Cui Wang<sup>a</sup>, Yongqi Wang<sup>a</sup>, Feng Li<sup>a, b, \*</sup>, Dangqiang Zhu<sup>a, \*</sup>

<sup>a</sup> College of Chemistry and Pharmaceutical Sciences, Qingdao Agricultural University, Qingdao 266109, People's Republic of China

<sup>b</sup> College of Plant Health & Medicine, Qingdao Agricultural University, Qingdao, 266109, People's Republic of China

\*Corresponding author. E-mail: lifeng@qau.edu.cn (F. Li); zhudq@qau.edu.cn (D.Q. Zhu)

## Reagents and Materials

3,3',5,5'-Tetramethylbenzidine (TMB) and NaOH were obtained from Sinopharm Chemical Reagent Co., Ltd. (Shanghai, China). Acetylcholinesterase (AChE) from drosophila was purchased from Solarbio. Water (18.2 M $\Omega$ ·cm) used in this work was obtained by a Milli-Q water purification system (Millipore). Acetylcholinesterase (AChE) from electric eel, Acetylthiocholine (ATCh), Pralidoxime Iodide and 5,5-Dithiobis-(2-nitrobenzoic acid) (DTNB) were obtained from Macklin Biochemical Co. Ltd. (Shanghai, China). Na<sub>2</sub>HPO<sub>4</sub>·2H<sub>2</sub>O and NaH<sub>2</sub>PO<sub>4</sub>·2H<sub>2</sub>O were ordered from Sigma-Aldrich (St. Louis, MO, USA). Paraoxon, Dursban, Parathion, Phoxim, Methidathion, Tichlorfon, Dichlorvos, Carbofuran, Carbosulfan and Thiamethoxam were obtained from Tanmo Quality Inspection Technology Co. Ltd.

## Apparatus

The surface morphology of the nanomaterial was characterized by TEM HT7700 (Hitachi, Japan). XPS ESCALAB 250Xi (Thermo Fisher Scientific, USA), and XRD Bruker D8 Advance X-ray diffractometer (Bruker, Germany) were employed to study the composition and valence state. UV-vis spectra were gotten from an UV-1800 spectrophotometer (Shimadzu, Japan).

## Experimental Section

### Synthesis of NC900

The synthesis route of the precursor Aza-CMP refers to our previous work (Small, 2022, 18, 2104993). And then, the power was pyrolyzed under N<sub>2</sub> atmosphere for 1 h at 900 °C with a heating rate of 3 °C/min. After cooling to room temperature, the black power (named NC900) was obtained without any post-treatment.

### Ellman Method

Typically, 40  $\mu$ L of various inhibitors (final concentration: 0, 0.01, 0.05, 0.1, 0.3, 0.5, 0.7, 1.0, 1.5, 2.0, and 3.0  $\mu$ M) were firstly mixed with 40  $\mu$ L of 200 mU mL<sup>-1</sup> AChE at 37 °C for 30 min. Subsequently, 40  $\mu$ L of 1.0 mM ATCh for another 30 min, and then 40  $\mu$ L of 0.5 mM DTNB was added, which was adjusted to 400  $\mu$ L with PBS buffer (pH 8.0). After the incubation for 30 min, the absorbance at 652 nm was monitored on a UV-1800 spectrophotometer.

### Inhibitors detection

Typically, 40  $\mu$ L of various inhibitors (final concentration: 0, 0.01, 0.05, 0.1, 0.3, 0.5, 0.7, 1.0, 1.5, 2.0, and 3.0  $\mu$ M) were firstly incubated with 40  $\mu$ L of 200 mU mL<sup>-1</sup> AChE at 37 °C for 30 min. Subsequently, 40  $\mu$ L of 1.0 mM ATCh and 40  $\mu$ L of 0.2 mg mL<sup>-1</sup> NC900 were added for another 30 min. After the addition of 40  $\mu$ L of 5.0 mM TMB, the system was adjusted to 400  $\mu$ L with NaAc-HAc buffer (200 mM, pH 4.0) and

incubated for 30 min. The UV-Vis spectra were monitored on a UV-1800 spectrophotometer, and the absorbance at 652 nm was assigned to the characteristic peak of oxTMB.

### **Influence of pH on the degradation behaviour of trichlorfon and carbosulfan**

Trichlorfon was incubated with NaAc-HAc buffer (pH 4.0 or pH 11.0), and then, 40  $\mu\text{L}$  of various concentrations (final concentration: 0.1, 0.5, 1.0, 2.0 and 3.0  $\mu\text{M}$ ) were mixed with 40  $\mu\text{L}$  of 200  $\text{mU mL}^{-1}$  AChE at 37  $^{\circ}\text{C}$  for 30 min. Subsequently, 40  $\mu\text{L}$  of 1.0 mM ATCh and 40  $\mu\text{L}$  of 0.2  $\text{mg mL}^{-1}$  NC900 were added for another 30 min. After the addition of 40  $\mu\text{L}$  of 5.0 mM TMB, the system was adjusted to 400  $\mu\text{L}$  with NaAc-HAc buffer (200 mM, pH 4.0). The absorbance at 652 nm was monitored on a UV-1800 spectrophotometer. The study of carbosulfan degradation was similar, except for the incubation of carbosulfan in the NaAc-HAc buffer (pH 4.0 or pH 9.0).

### **Joint Inhibition**

20  $\mu\text{L}$  of various dursban concentrations (1.0, 3.0, 5.0, 7.0 and 10  $\mu\text{M}$ ) were firstly mixed with 20  $\mu\text{L}$  of other pesticide with the same concentration, and then 40  $\mu\text{L}$  of 200  $\text{mU mL}^{-1}$  AChE was added. After incubation at 37  $^{\circ}\text{C}$  for 30 min, 40  $\mu\text{L}$  of 1.0 mM ATCh and 40  $\mu\text{L}$  of 0.2  $\text{mg mL}^{-1}$  NC900 were added at 37  $^{\circ}\text{C}$  for 30 min. After the addition of 40  $\mu\text{L}$  of 5.0 mM TMB, the system was adjusted to 400  $\mu\text{L}$  with NaAc-HAc buffer (200 mM, pH 4.0) and incubated for 30 min. The absorbance at 652 nm was monitored on a UV-1800 spectrophotometer.

The theoretical absorbance  $A = (A_1 + A_2)/2$ ;  $A_1$ : the absorbance of the system based on the inhibitory ability of dursban with the same concentration on AChE;  $A_2$ : the absorbance of the system based on the inhibitory ability of mixed pesticide with the same concentration on AChE.

### **Screening of AChE activator**

After the above-described incubation of inhibitors and AChE, the pralidoxime iodide with various concentrations was added for 30 min. Subsequently, the similar procedure was operated. The UV-Vis spectra were monitored on a UV-1800 spectrophotometer.

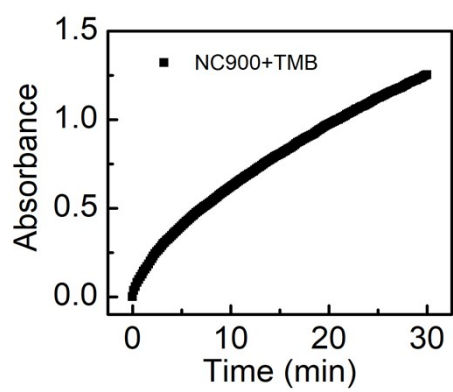

**Figure S1.** Time-dependent absorbance changes at 652 nm upon TMB oxidation.

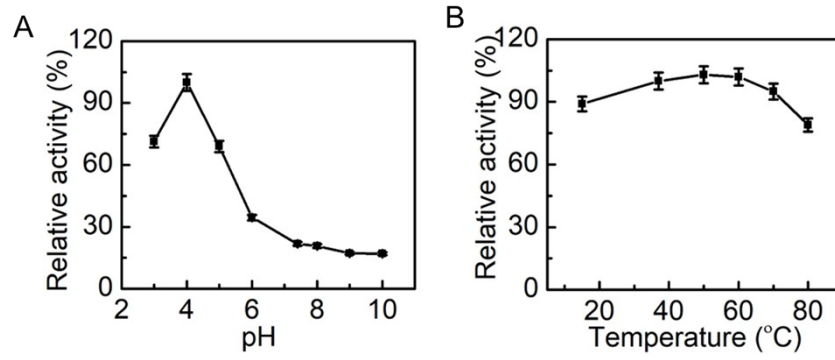

**Figure S2.** Influence of pH (A) and temperatures (B) on the catalytic activity of NC900.

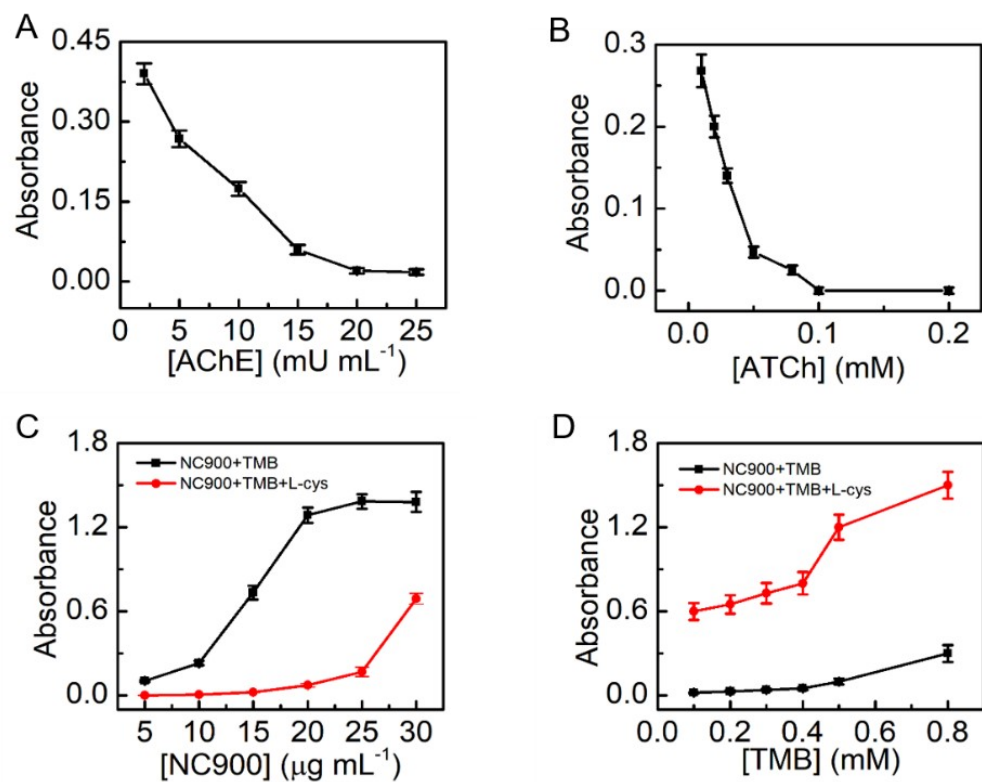

**Figure S3.** The influence of various factors on the assay, including AChE concentration (A); ATCh concentration (B); nanozyme concentration (C); and TMB concentration (D)

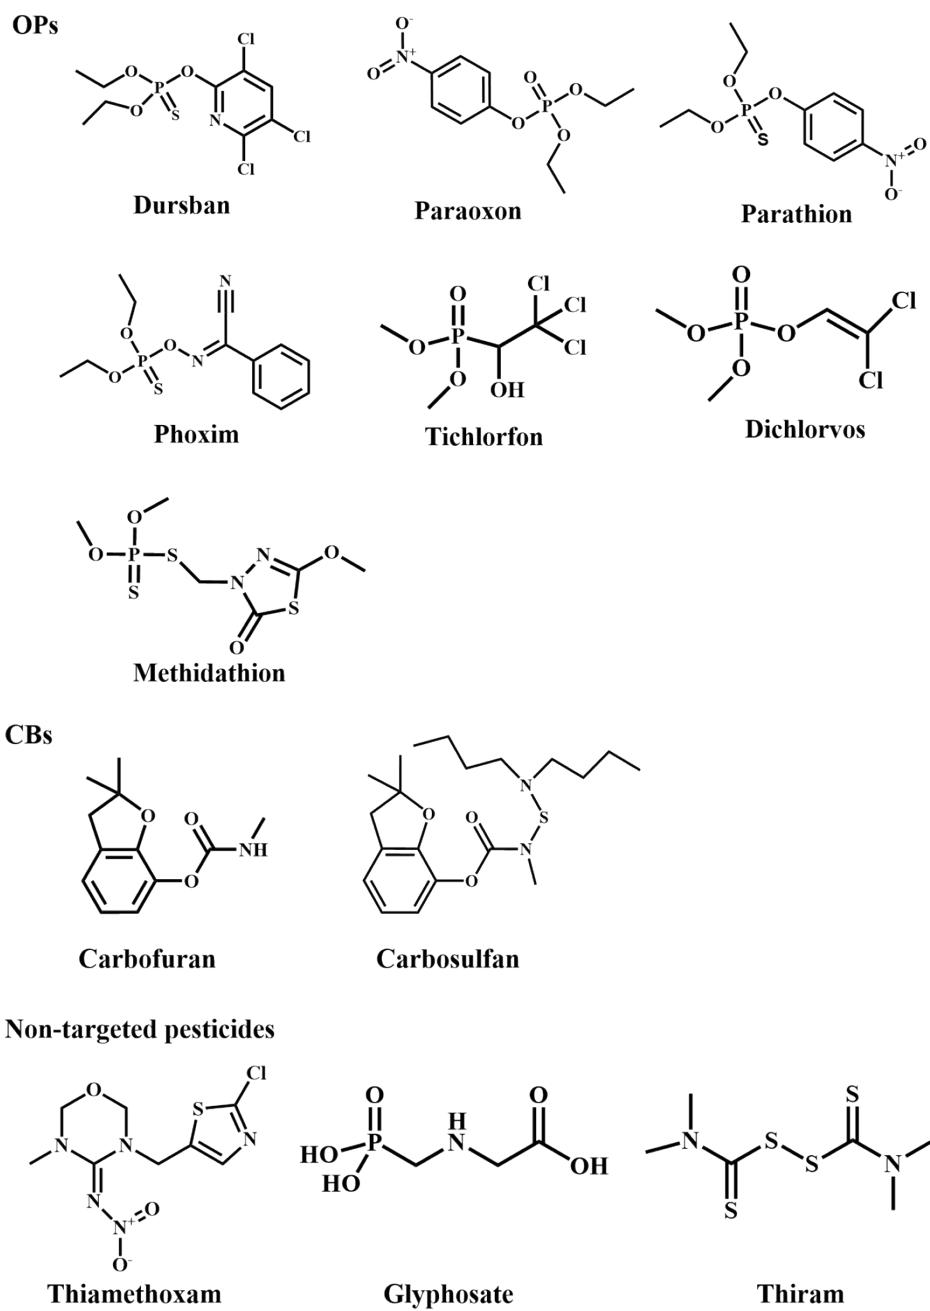

**Figure S4.** The chemical structures of the used pesticides in this work.

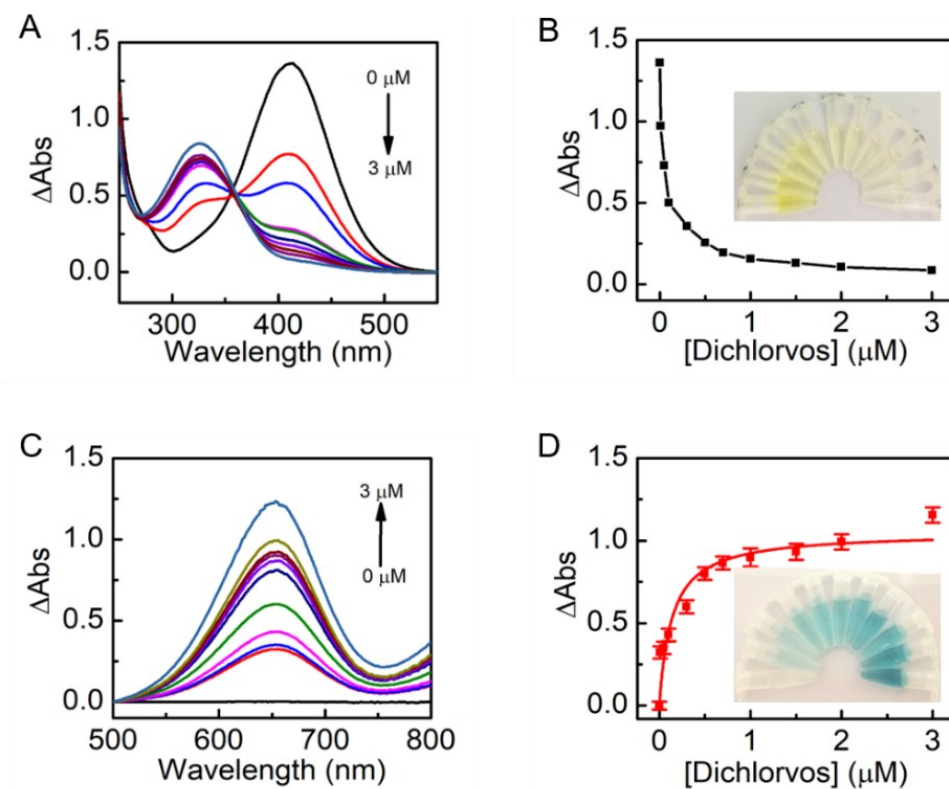

**Figure S5.** For Ellman's method: UV-vis absorption spectra with different dichlorvos concentration (A); the relationship between dichlorvos concentration and absorbance (B); For nanozyme-mediated assay: UV-vis absorption spectra with different dichlorvos concentration (C); the relationship between dichlorvos concentration and absorbance (D).



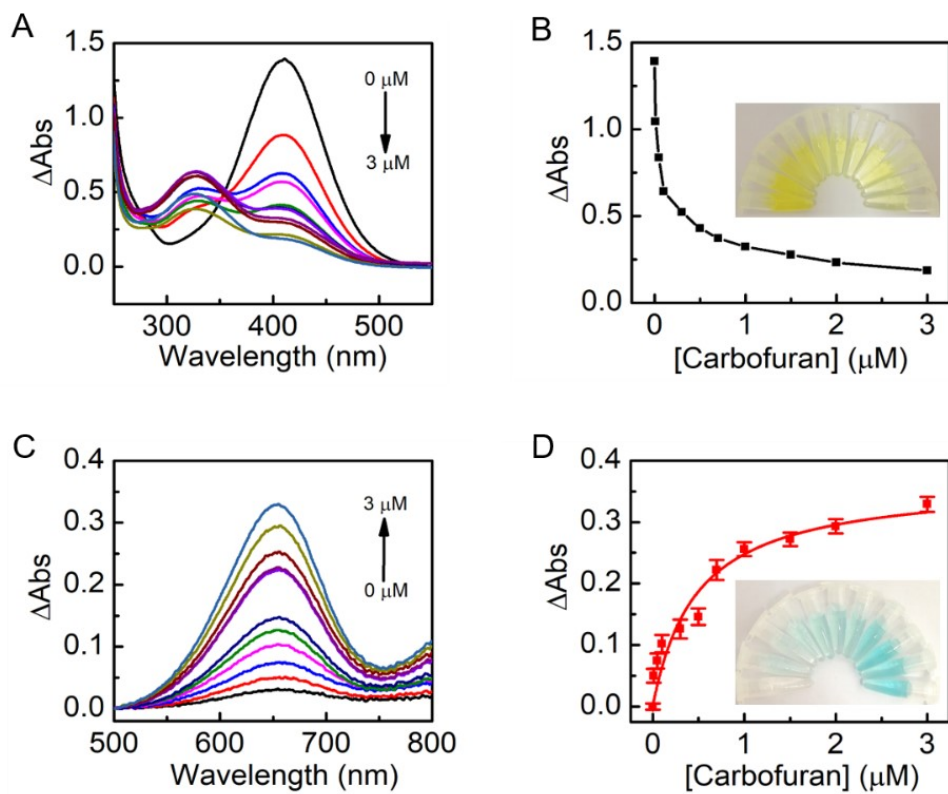

**Figure S6.** For Ellman's method: UV-vis spectra with different carbofuran concentration (A); the relationship between carbofuran concentration and absorbance (B); For nanozyme-mediated assay: UV-vis spectra with different carbofuran concentration (C); the relationship between carbofuran concentration and absorbance (D).

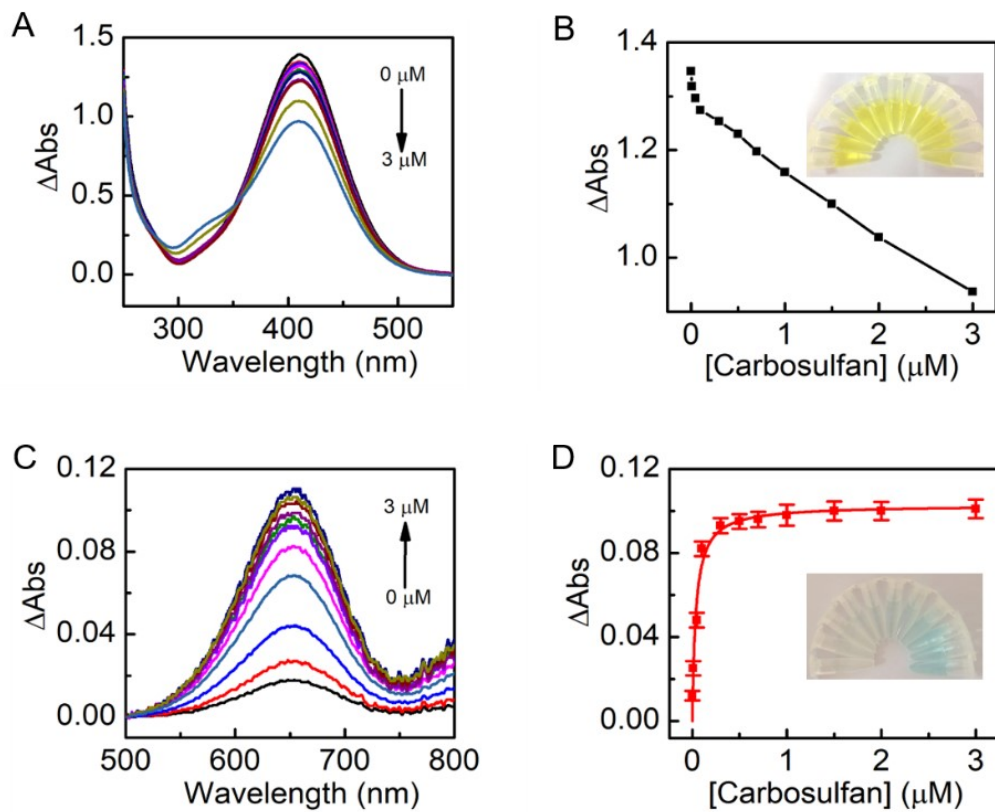

**Figure S7.** For Ellman's method: UV-vis spectra with different carbosulfan concentration (A); the relationship between carbosulfan concentration and absorbance (B); For nanozyme-mediated assay: UV-vis spectra with different carbosulfan concentration (C); the relationship between carbosulfan concentration and absorbance (D).

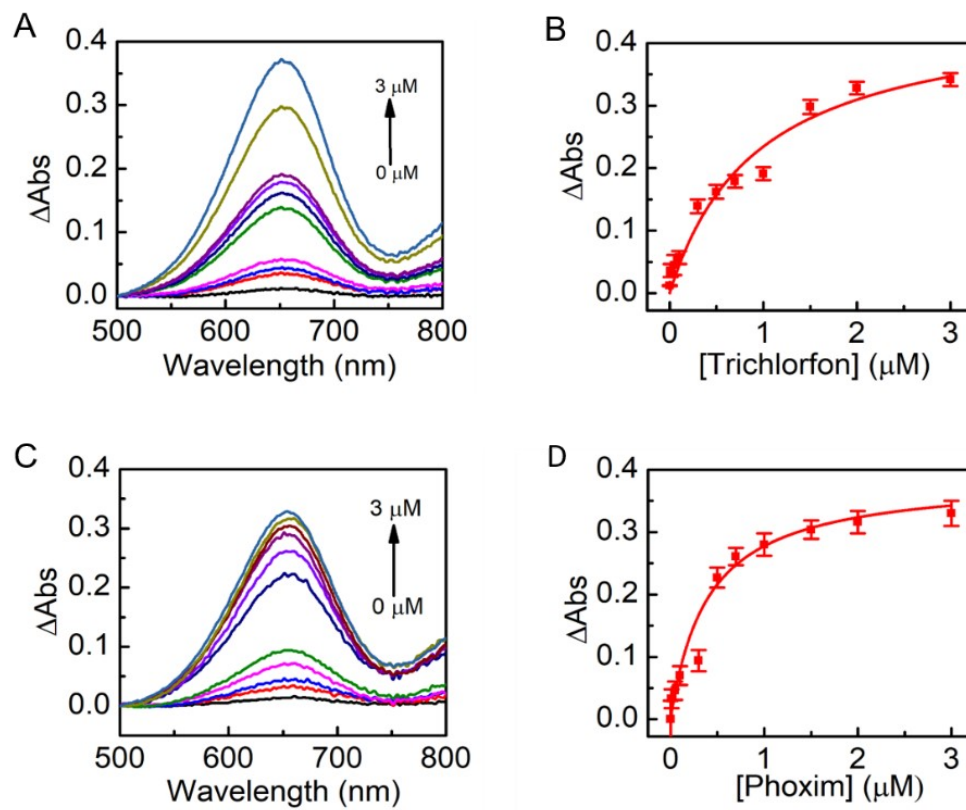

**Figure S8.** UV-vis spectra with different trichlorfon concentration (A); the relationship between trichlorfon concentration and absorbance (B); UV-vis spectra with different phioxm concentration (C); the relationship between phioxm concentration and absorbance (D).

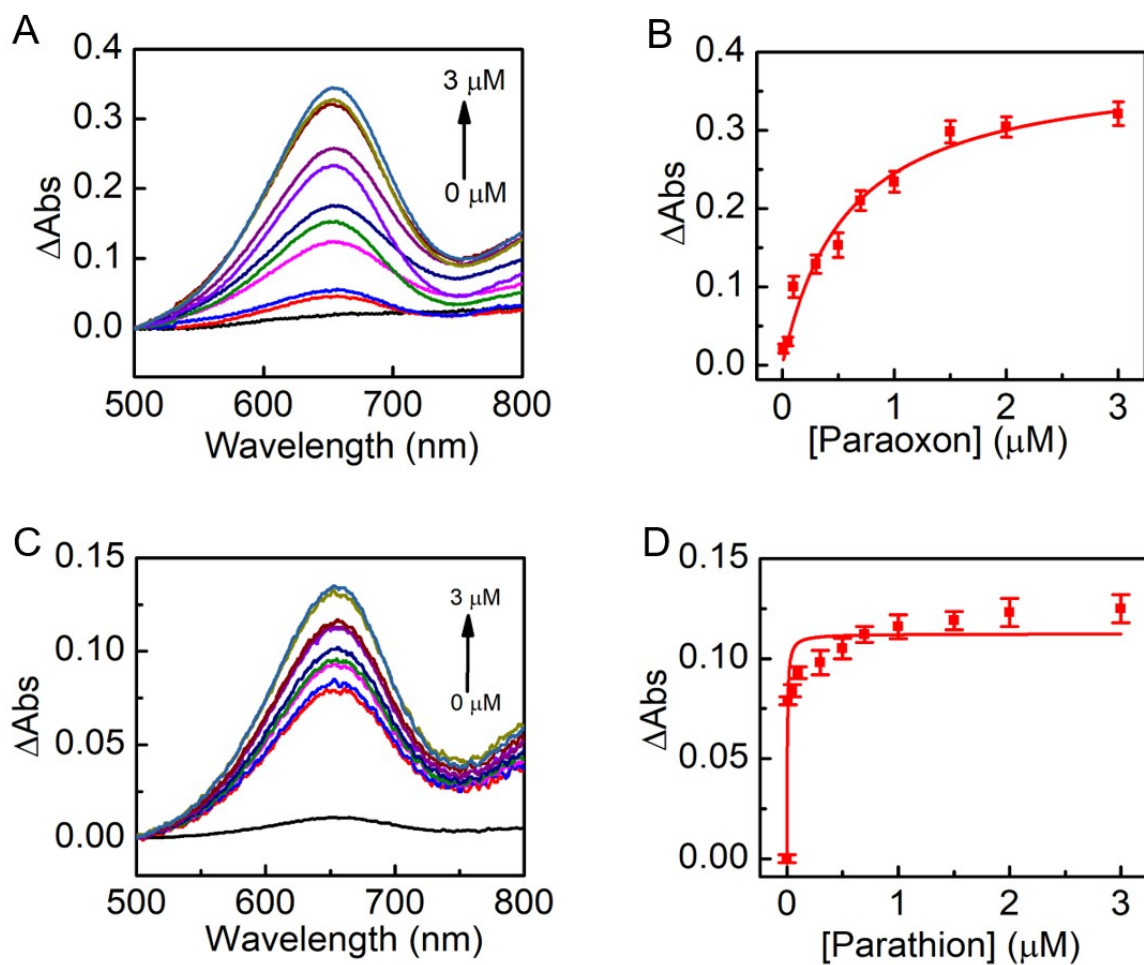

**Figure S9.** UV-vis spectra with different paraoxon concentration (A); the relationship between paraoxon concentration and absorbance (B); UV-vis spectra with different parathion concentration (C); the relationship between parathion concentration and absorbance (D).

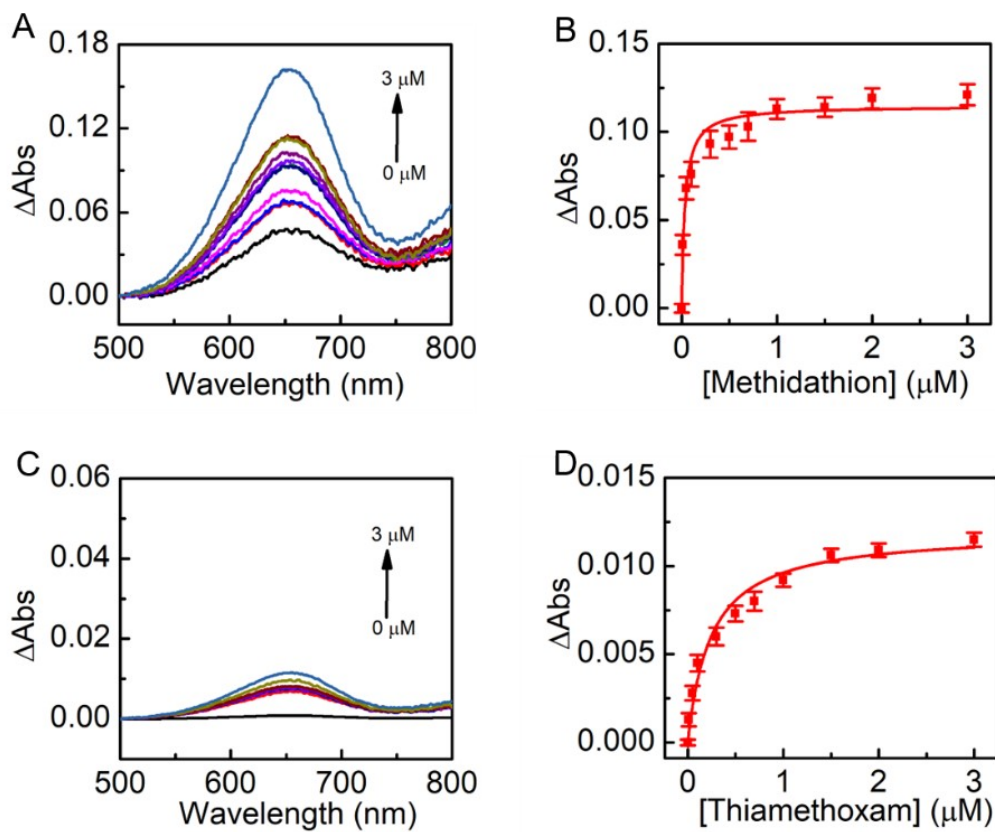

**Figure S10.** UV-vis spectra with different methidathion concentration (A); the relationship between methidathion concentration and absorbance (B); UV-vis spectra with different thiamethoxam concentration (C); the relationship between thiamethoxam concentration and absorbance (D).

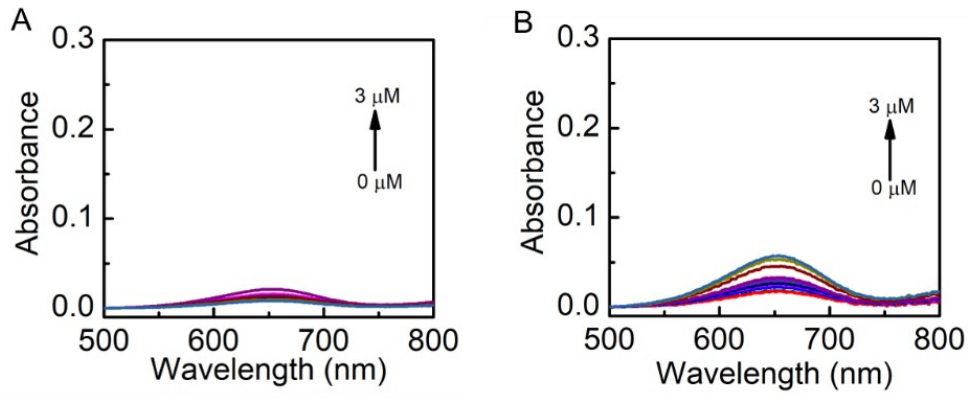

**Figure S11.** UV-vis spectra with different glyphosate concentration (A) and thiram concentration (B).

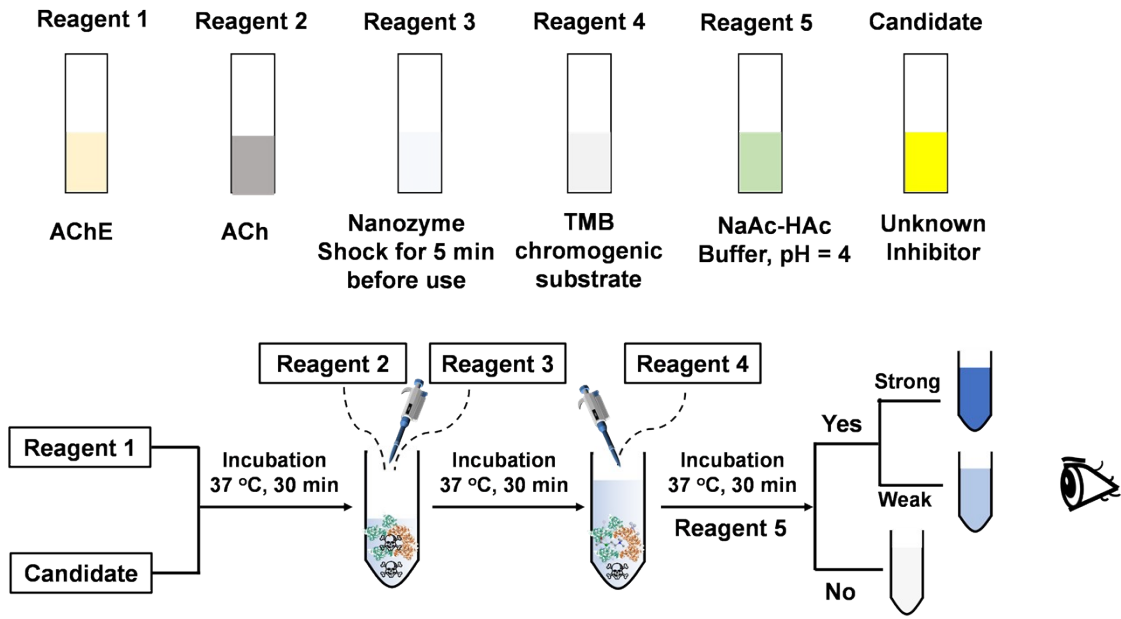

Figure 12. The proposed kit for AChE inhibitors screening.

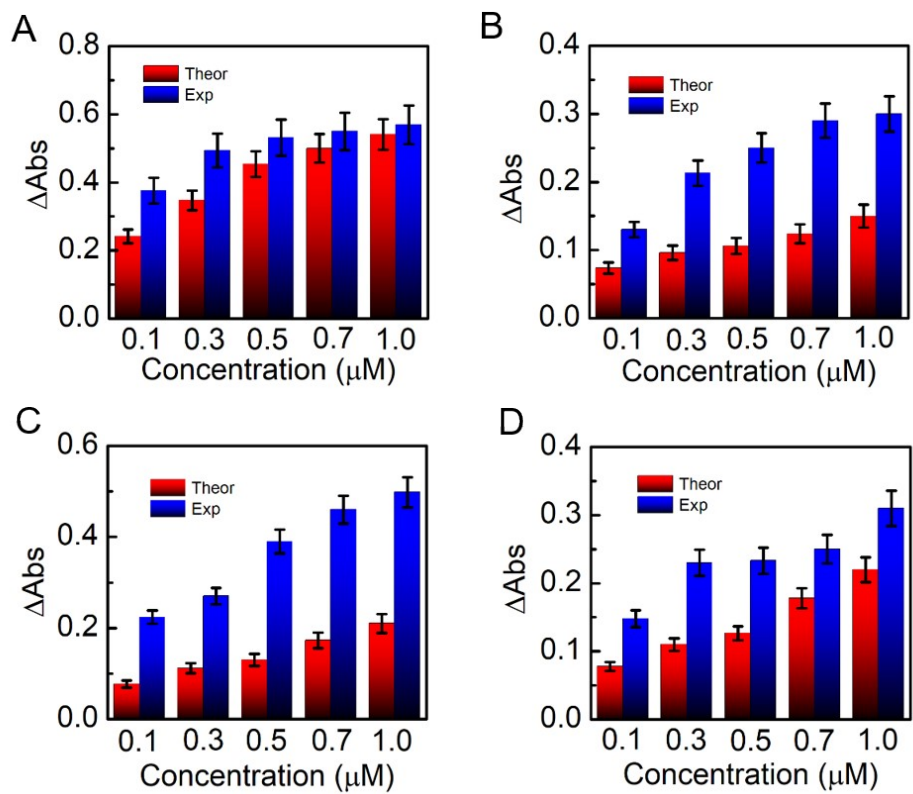

**Figure S13.** The absorbance changes of the system based on the mixture of dursban and other pesticide: dichlorvos (A); parathion (B); paraoxon (C); carbofuran (D).



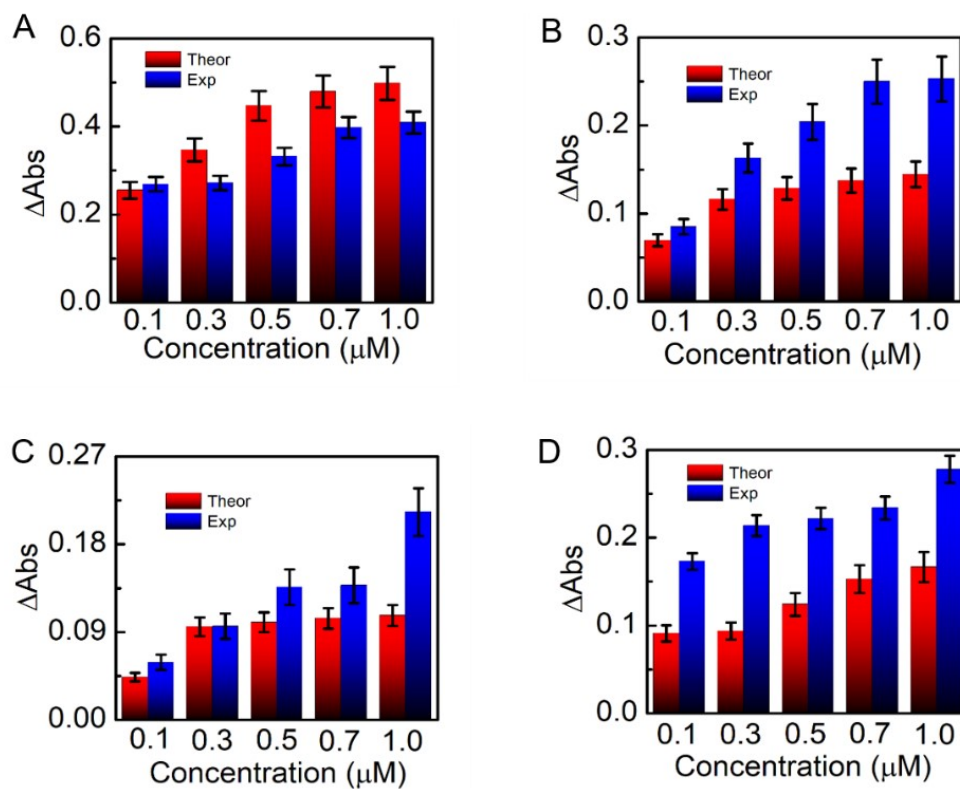

**Figure S14.** The absorbance change of carbosulfan mixed with different pesticides dichlorvos (A); trichlorfon (B); parathion (C); paraoxon (D).

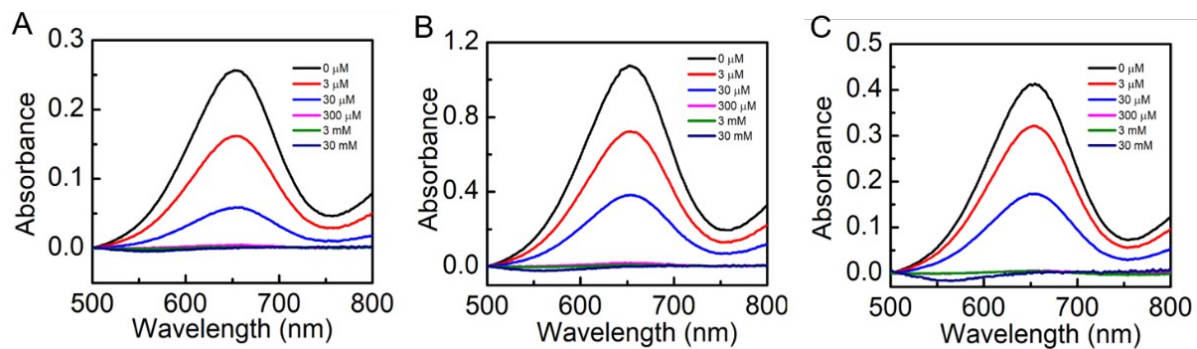

**Figure S15.** The influence of various pesticides mixed with pralidoxime iodide on absorbance spectra: dursban (A), dichlorvos (B), and trichlorfon (C).

**Table S1. Contents of C, N, and O for NC900 from XPS characterization.**

| Sample | C (atomic%) | N (atomic%) | O (atomic%) |
|--------|-------------|-------------|-------------|
| NC900  | 87.09       | 4.39        | 8.52        |

**Table S2. Contents of different N species for NC900 from XPS characterization.**

| Sample | Pyridinic-N (%) | Pyrrolic-N (%) | Graphitic-N (%) | Oxidized-N (%) |
|--------|-----------------|----------------|-----------------|----------------|
| NC900  | 36.0            | 11.5           | 39.8            | 12.7           |

**Table S3.** Comparison of the kinetic constants of oxidase-like carbon nanozymes.

| Catalyst             | Nanozyme (mg L <sup>-1</sup> ) | K <sub>m</sub> (mM) | V <sub>max</sub> (10 <sup>-7</sup> M s <sup>-1</sup> ) | Ref                                          |
|----------------------|--------------------------------|---------------------|--------------------------------------------------------|----------------------------------------------|
| NC900                | 20                             | 0.26                | 1.52                                                   | <b>This work</b>                             |
| N-PCNSs-5            | 25                             | 0.095               | 0.027                                                  | <i>Nat. Commun.</i> 2018, 9, 1440.           |
| N-PCNSs-3            | 25                             | 0.084               | 0.040                                                  |                                              |
| CSF-900              | 50                             | 0.713               | 0.095                                                  | <i>Small</i> 2020, 16, 2004129               |
| SeNPs                | /                              | 8.3                 | 0.507                                                  | <i>J. Nanopart. Res.</i> 2016, 18, 74.       |
| CS-SeNPs             | /                              | 0.852               | 0.238                                                  | <i>Biochem. Engin. J.</i> 2019, 152, 107384. |
| Triazine-based CTF-1 | /                              | 0.48                | ---                                                    | <i>Microchem. J.</i> 2017, 135, 91.          |
| QAU-Z1               | 25                             | 0.102               | 0.12                                                   | <i>Small</i> 2022, 18, 2104993               |
| Fe-N-C               | 5                              | 1.81                | 0.60                                                   | <i>Small</i> 2019, 15, 1903108.              |
| Co-N-C               | 10                             | 0.15                | 0.11                                                   | <i>Anal Bioanal Chem</i> 2022, 414, 1857     |
| SA Fe-N-C            | 10                             | 0.114               | 0.65                                                   | <i>Chem. Sci.</i> 2022,13, 4566              |
| SA Fe nanozyme       | 5                              | 0.13                | 0.225                                                  | <i>Chem. Commun.</i> 2019, 55 2285.          |
| N-CDs                | 25                             | 0.094               | 0.065                                                  | <i>Nano Today</i> 2022, 45, 101530           |
| Fe-CDs               | 25                             | 0.071               | 0.171                                                  |                                              |
| Fe-N/C-CNTs          | 20                             | 0.62                | 5.26                                                   | <i>Chem. Commun.</i> 2019, 55 5271.          |
| Fe-N/C               | 20                             | 0.94                | 5.98                                                   | <i>Sens. Actuators B.</i> 2020, 305 127511   |

**Table S4. Summary of the relationship between inhibitor concentration and absorbance**

| Pesticide    | M-M equation                       | $K_m$   | $A_m$   | $R^2$ |
|--------------|------------------------------------|---------|---------|-------|
| Dursban      | $A = \frac{0.21575c}{0.39369 + c}$ | 0.39369 | 0.21575 | 0.958 |
| Dichlorvos   | $A = \frac{1.05092c}{0.13813 + c}$ | 0.13813 | 1.05092 | 0.924 |
| Carbofuran   | $A = \frac{0.36658c}{0.47978 + c}$ | 0.47978 | 0.36658 | 0.967 |
| Carbosulfan  | $A = \frac{0.10282c}{0.03932 + c}$ | 0.03932 | 0.10282 | 0.959 |
| Tichlorfon   | $A = \frac{0.45607c}{0.94644 + c}$ | 0.94644 | 0.45607 | 0.925 |
| Phoxim       | $A = \frac{0.38818c}{0.39833 + c}$ | 0.39833 | 0.38818 | 0.963 |
| Paraoxon     | $A = \frac{0.38712c}{0.58014 + c}$ | 0.58014 | 0.38712 | 0.970 |
| Parathion    | $A = \frac{0.11241c}{0.00428 + c}$ | 0.00428 | 0.11241 | 0.986 |
| Methidathion | $A = \frac{0.11474c}{0.03491 + c}$ | 0.03491 | 0.11474 | 0.987 |
| Thiamethoxam | $A = \frac{0.01195c}{0.24304 + c}$ | 0.24304 | 0.01195 | 0.986 |
